# Supplementary material for: A PB1-K577E Mutation in H9N2 Influenza Virus Increases Polymerase Activity and Pathogenicity in Mice
Source: MDPI journal article supplement (doi:10.3390/v10110653), 2018-11-19
Supplement: s1 [file s1]

## **Supplementary Information**

### **A PB1-K577E mutation in H9N2 influenza virus increases polymerase activity and pathogenicity in mice**

Haruhiko Kamiki, Hiromichi Matsugo, Tomoya Kobayashi, Hiroho Ishida, Akiko Takenaka-Uema, Shin Murakami & Taisuke Horimoto

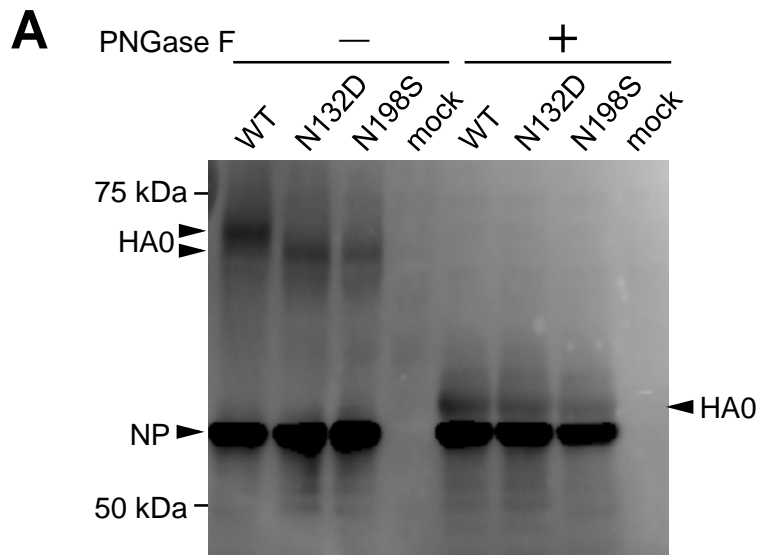

**B**

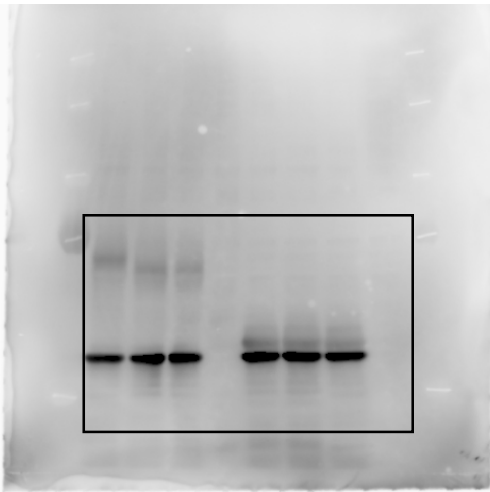

**C**

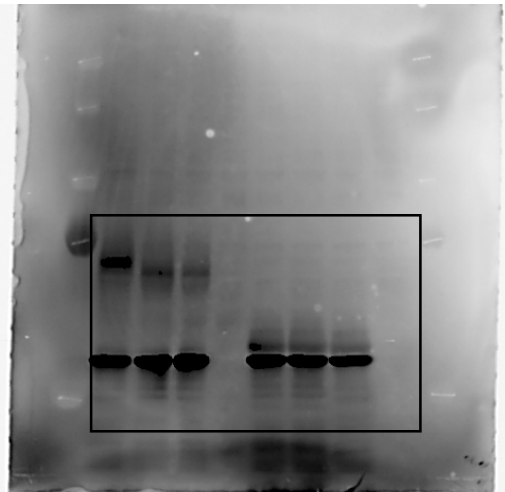

**Figure S1.** Deglycosylation of HA caused by mutation. MDCK cells were infected with viruses bearing a wild-type or mutant HA (N132D or N198S) and incubated at 37 °C for 12 hours. Proteins were extracted from infected or mock-infected cells and treated with or without PNGase F. The samples were run on an 8% SDS-polyacrylamide gel and transferred to a PVDF membrane for western blotting analysis using anti-H9N2 virus mouse polyclonal antibody as the primary antibody. HA0 and NP are indicated by arrowheads. This gel/blot was uncropped (A). Multiple exposure images of the full-size gels/blots are also shown (B, C).
